# Supplementary material for: The effects of radiofrequency exposure on male fertility and adverse reproductive outcomes: A protocol for two systematic reviews of human observational studies with meta-analysis
Source: PubMed Central journal article supplement (PMC8669072; doi:10.1016/j.envint.2021.106968), 2022-01
Supplement: mmc2.pdf [file mmc2.pdf]

Supplementary File 2

Search strategies for each database

Medline search v1.0 – Run on 19<sup>th</sup> November 2020

Database(s): **Ovid MEDLINE(R) and Epub Ahead of Print, In-Process & Other Non-Indexed Citations, Daily and Versions(R)** 1946 to November 17, 2020

Search Strategy:

| #  | Searches                                                                                                                              | Results |
|----|---------------------------------------------------------------------------------------------------------------------------------------|---------|
| 1  | "Cell Phone Use"/                                                                                                                     | 221     |
| 2  | exp Cell Phone/                                                                                                                       | 11043   |
| 3  | (smartphone or cellphone or iphone).ti,ab,kw.                                                                                         | 11256   |
| 4  | ((cell* or mobile or car or smart or dect or cordless) adj (phone* or telephone* or device* or handset* or communication*)).ti,ab,kw. | 26698   |
| 5  | exp Radio Waves/                                                                                                                      | 23796   |
| 6  | Radio/                                                                                                                                | 2191    |
| 7  | ("radio wave*" or radiowave* or "micro wave*" or microwave*).ti,ab,kw.                                                                | 38690   |
| 8  | ((("non ioni#ing" or nonioni#ing) adj radiation).ti,ab,kw.                                                                            | 902     |
| 9  | Electromagnetic Fields/                                                                                                               | 17191   |
| 10 | ((radiofrequency or electromagnetic) adj2 (field* or exposure* or radiation or wave* or energy)).ti,ab,kw.                            | 19955   |
| 11 | ((radio or broadcast*) adj transmitter*).ti,ab,kw.                                                                                    | 326     |
| 12 | broadcasting.ti,ab,kw.                                                                                                                | 1059    |
| 13 | ((radio or telegraph) adj operator*).ti,ab,kw.                                                                                        | 62      |
| 14 | Radar/                                                                                                                                | 1230    |
| 15 | radar*.ti,ab,kw.                                                                                                                      | 5536    |
| 16 | "base station*".ti,ab,kw.                                                                                                             | 926     |
| 17 | (mast adj3 (phone* or telephone* or mobile* or network* or communication* or television* or TV or radio)).ti,ab,kw.                   | 76      |
| 18 | "plastic sealer*".ti,ab,kw.                                                                                                           | 9       |
| 19 | (FM adj (radio or signal*)).ti,ab,kw.                                                                                                 | 166     |
| 20 | Television/                                                                                                                           | 13503   |

|    |                                                                                                                                                                    |       |
|----|--------------------------------------------------------------------------------------------------------------------------------------------------------------------|-------|
| 21 | ((television or TV) adj signal).ti,ab,kw.                                                                                                                          | 23    |
| 22 | ((1G or 2G or 3G or 4G or 5G) and network*).ti,ab,kw.                                                                                                              | 458   |
| 23 | "access point*".ti,ab,kw.                                                                                                                                          | 932   |
| 24 | "Total Access Communication System".ti,ab,kw.                                                                                                                      | 2     |
| 25 | (TACS and (phone* or telephone* or communication* or network*)).ti,ab,kw.                                                                                          | 137   |
| 26 | "Code-division multiple access".ti,ab,kw.                                                                                                                          | 212   |
| 27 | (CDMA or WCDMA).ti,ab,kw.                                                                                                                                          | 223   |
| 28 | "Global System for Mobile*".ti,ab,kw.                                                                                                                              | 325   |
| 29 | (GSM and (phone* or telephone* or communication* or network*)).ti,ab,kw.                                                                                           | 703   |
| 30 | "digital cellular system".ti,ab,kw.                                                                                                                                | 10    |
| 31 | (dcs and (phone* or telephone* or communication* or network*)).ti,ab,kw.                                                                                           | 720   |
| 32 | "Universal Mobile Telecommunication*".ti,ab,kw.                                                                                                                    | 89    |
| 33 | (UMTS and (phone* or telephone* or communication* or network*)).ti,ab,kw.                                                                                          | 134   |
| 34 | "Long-Term Evolution".ti,ab,kw.                                                                                                                                    | 1515  |
| 35 | (LTE and (phone* or telephone* or communication* or network*)).ti,ab,kw.                                                                                           | 135   |
| 36 | "Worldwide Interoperability for Microwave Access".ti,ab,kw.                                                                                                        | 17    |
| 37 | WiMax.ti,ab,kw.                                                                                                                                                    | 72    |
| 38 | "Terrestrial Trunked Radio".ti,ab,kw.                                                                                                                              | 22    |
| 39 | (Tetra and radio).ti,ab,kw.                                                                                                                                        | 48    |
| 40 | "Digital Enhanced Cordless Telecommunication*".ti,ab,kw.                                                                                                           | 19    |
| 41 | Wireless Technology/                                                                                                                                               | 3667  |
| 42 | ((wifi or "wi fi" or wireless or broadband or bluetooth or "blue tooth" or laptop*) and (signal* or network* or communication* or frequenc* or output*)).ti,ab,kw. | 17952 |
| 43 | (WLAN or "Wireless Local Area Network").ti,ab,kw.                                                                                                                  | 249   |
| 44 | ((millimetre or millimeter or mm) adj wave*).ti,ab,kw.                                                                                                             | 1517  |
| 45 | Satellite Communications/                                                                                                                                          | 1238  |

|    |                                                                                                                              |        |
|----|------------------------------------------------------------------------------------------------------------------------------|--------|
| 46 | "satellite communication*".ti,ab,kw.                                                                                         | 166    |
| 47 | (uplink or downlink).ti,ab,kw.                                                                                               | 407    |
| 48 | exp Telemetry/                                                                                                               | 13525  |
| 49 | telemetry.ti,ab,kw.                                                                                                          | 7217   |
| 50 | ("w/kg" or "specific absorption rate").ti,ab,kw.                                                                             | 4427   |
| 51 | or/1-50                                                                                                                      | 174390 |
| 52 | Radiofrequency Ablation/                                                                                                     | 949    |
| 53 | 51 not 52                                                                                                                    | 174248 |
| 54 | exp Infertility, Male/                                                                                                       | 28090  |
| 55 | (aspermia or asthenozoospermia or azoospermia or oligospermia or "sertoli cell-only syndrome" or teratozoospermia).ti,ab,kw. | 8745   |
| 56 | (sperm adj1 (count or quality or motility or abnormal or mobility or morphology)).ti,ab,kw.                                  | 19341  |
| 57 | ((infertil* or fertil*) adj1 (male* or man or men)).ti,ab,kw.                                                                | 19712  |
| 58 | or/54-57                                                                                                                     | 52558  |
| 59 | 51 and 58                                                                                                                    | 266    |
| 60 | Infertility, Female/                                                                                                         | 28666  |
| 61 | ((infertil* or fertil*) adj1 (female* or wom#n)).ti,ab,kw.                                                                   | 7200   |
| 62 | exp Abortion, Spontaneous/                                                                                                   | 35413  |
| 63 | Aborted Fetus/                                                                                                               | 1229   |
| 64 | exp Abortion, Induced/                                                                                                       | 40355  |
| 65 | miscarr*.ti,ab,kw.                                                                                                           | 14890  |
| 66 | (abort* adj1 (spontaneous or missed or incomplete or habitual or induce* or therapeutic or eugenic)).ti,ab,kw.               | 20338  |
| 67 | Fetal Growth Retardation/                                                                                                    | 16481  |
| 68 | ((f?etal or intrauterine) adj "growth retardation").ti,ab,kw.                                                                | 6984   |
| 69 | Stillbirth/                                                                                                                  | 4973   |
| 70 | (stillbirth or stillborn or "still born").ti,ab,kw.                                                                          | 11749  |

|    |                                                                                                                                                                                                                         |        |
|----|-------------------------------------------------------------------------------------------------------------------------------------------------------------------------------------------------------------------------|--------|
| 71 | exp Infant, Low Birth Weight/                                                                                                                                                                                           | 34758  |
| 72 | Sex Ratio/                                                                                                                                                                                                              | 9304   |
| 73 | "sex ratio*" .ti,ab,kw.                                                                                                                                                                                                 | 15141  |
| 74 | exp twinning, embryonic/                                                                                                                                                                                                | 234    |
| 75 | exp Multiple Birth Offspring/                                                                                                                                                                                           | 28545  |
| 76 | ("multiple birth*" or twins or triplets or quadruplets or quintuplets or twinning).ti,ab,kw.                                                                                                                            | 39650  |
| 77 | ((congenital or developmental or embryonic) adj1 (disorder* or disease* or condition* or abnormalit* or malformation* or anomal* or defect*)).ti,ab,kw.                                                                 | 75853  |
| 78 | exp Congenital Abnormalities/                                                                                                                                                                                           | 596603 |
| 79 | Maternal Exposure/                                                                                                                                                                                                      | 9528   |
| 80 | Prenatal Exposure Delayed Effects/                                                                                                                                                                                      | 29745  |
| 81 | "prenatal development*" .ti,ab,kw.                                                                                                                                                                                      | 2270   |
| 82 | exp "Embryonic and Fetal Development"/                                                                                                                                                                                  | 277801 |
| 83 | ((embryonic or f?etal) adj (development or death)).ti,ab,kw.                                                                                                                                                            | 46769  |
| 84 | exp Pregnancy Trimesters/ or exp Pregnancy/ or exp Pregnancy Outcome/ or exp Pregnancy Complications/                                                                                                                   | 931381 |
| 85 | exp Pregnant Women/                                                                                                                                                                                                     | 8626   |
| 86 | exp Parturition/                                                                                                                                                                                                        | 17522  |
| 87 | exp Gravidity/                                                                                                                                                                                                          | 1201   |
| 88 | exp Parity/                                                                                                                                                                                                             | 25185  |
| 89 | exp Infant, Newborn/                                                                                                                                                                                                    | 613337 |
| 90 | exp Fetus/                                                                                                                                                                                                              | 157975 |
| 91 | pregnan* .ti,ab,kw.                                                                                                                                                                                                     | 531613 |
| 92 | (prenatal or "pre natal" or antenatal or "ante natal" or antepartum or "ante partum" or postnatal or "post natal" or postpartum or "post partum" or perinatal or "peri natal" or peripartum or "peri partum").ti,ab,kw. | 334189 |
| 93 | (matern* or mother* or baby or babies or f?etal or f?etus or neonat* or newborn or "new born").ti,ab,kw.                                                                                                                | 939198 |
| 94 | (birth* or childbirth).ti,ab,kw.                                                                                                                                                                                        | 355245 |

|    |                                   |         |
|----|-----------------------------------|---------|
| 95 | (preterm or "pre term").ti,ab,kw. | 77034   |
| 96 | gestation*.ti,ab,kw.              | 212626  |
| 97 | or/60-96                          | 2716896 |
| 98 | 51 and 97                         | 7253    |
| 99 | 59 or 98                          | 7481    |

## Embase v1.0 - run on 19<sup>th</sup> November 2020

Database(s): **Embase** 1974 to 2020 November 18

Search Strategy:

| #  | Searches                                                                                                                              | Results |
|----|---------------------------------------------------------------------------------------------------------------------------------------|---------|
| 1  | "Cell Phone Use"/                                                                                                                     | 921     |
| 2  | exp mobile phone/                                                                                                                     | 30843   |
| 3  | (smartphone or cellphone or iphone).ti,ab,kw.                                                                                         | 15549   |
| 4  | ((cell* or mobile or car or smart or dect or cordless) adj (phone* or telephone* or device* or handset* or communication*)).ti,ab,kw. | 36359   |
| 5  | radiofrequency radiation/                                                                                                             | 6255    |
| 6  | Radio/                                                                                                                                | 630     |
| 7  | ("radio wave*" or radiowave* or "micro wave*" or microwave*).ti,ab,kw.                                                                | 43457   |
| 8  | ((("non ioni#ing" or nonioni#ing) adj radiation).ti,ab,kw.                                                                            | 1234    |
| 9  | electromagnetism/                                                                                                                     | 4467    |
| 10 | ((radiofrequency or electromagnetic) adj2 (field* or exposure* or radiation or wave* or energy)).ti,ab,kw.                            | 21228   |
| 11 | ((radio or broadcast*) adj transmitter*).ti,ab,kw.                                                                                    | 355     |
| 12 | broadcasting.ti,ab,kw.                                                                                                                | 1142    |
| 13 | ((radio or telegraph) adj operator*).ti,ab,kw.                                                                                        | 57      |
| 14 | telecommunication/                                                                                                                    | 25232   |
| 15 | radar*.ti,ab,kw.                                                                                                                      | 5320    |
| 16 | "base station*".ti,ab,kw.                                                                                                             | 1044    |
| 17 | (mast adj3 (phone* or telephone* or mobile* or network* or communication* or television* or TV or radio)).ti,ab,kw.                   | 104     |
| 18 | "plastic sealer*".ti,ab,kw.                                                                                                           | 11      |
| 19 | (FM adj (radio or signal*)).ti,ab,kw.                                                                                                 | 171     |
| 20 | Television/                                                                                                                           | 13948   |
| 21 | ((television or TV) adj signal).ti,ab,kw.                                                                                             | 25      |
| 22 | ((1G or 2G or 3G or 4G or 5G) and network*).ti,ab,kw.                                                                                 | 621     |

|    |                                                                                                                                                                    |       |
|----|--------------------------------------------------------------------------------------------------------------------------------------------------------------------|-------|
| 23 | "access point*".ti,ab,kw.                                                                                                                                          | 1303  |
| 24 | "Total Access Communication System".ti,ab,kw.                                                                                                                      | 3     |
| 25 | (TACS and (phone* or telephone* or communication* or network*)).ti,ab,kw.                                                                                          | 246   |
| 26 | "Code-division multiple access".ti,ab,kw.                                                                                                                          | 157   |
| 27 | (CDMA or WCDMA).ti,ab,kw.                                                                                                                                          | 228   |
| 28 | "Global System for Mobile*".ti,ab,kw.                                                                                                                              | 372   |
| 29 | (GSM and (phone* or telephone* or communication* or network*)).ti,ab,kw.                                                                                           | 902   |
| 30 | "digital cellular system".ti,ab,kw.                                                                                                                                | 9     |
| 31 | (dcs and (phone* or telephone* or communication* or network*)).ti,ab,kw.                                                                                           | 1074  |
| 32 | "Universal Mobile Telecommunication*".ti,ab,kw.                                                                                                                    | 90    |
| 33 | (UMTS and (phone* or telephone* or communication* or network*)).ti,ab,kw.                                                                                          | 163   |
| 34 | "Long-Term Evolution".ti,ab,kw.                                                                                                                                    | 2095  |
| 35 | (LTE and (phone* or telephone* or communication* or network*)).ti,ab,kw.                                                                                           | 155   |
| 36 | "Worldwide Interoperability for Microwave Access".ti,ab,kw.                                                                                                        | 16    |
| 37 | WiMax.ti,ab,kw.                                                                                                                                                    | 78    |
| 38 | "Terrestrial Trunked Radio".ti,ab,kw.                                                                                                                              | 23    |
| 39 | (Tetra and radio).ti,ab,kw.                                                                                                                                        | 74    |
| 40 | "Digital Enhanced Cordless Telecommunication*".ti,ab,kw.                                                                                                           | 20    |
| 41 | wireless communication/                                                                                                                                            | 5523  |
| 42 | ((wifi or "wi fi" or wireless or broadband or bluetooth or "blue tooth" or laptop*) and (signal* or network* or communication* or frequenc* or output*)).ti,ab,kw. | 18613 |
| 43 | (WLAN or "Wireless Local Area Network").ti,ab,kw.                                                                                                                  | 277   |
| 44 | ((millimetre or millimeter or mm) adj wave*).ti,ab,kw.                                                                                                             | 987   |
| 45 | "satellite communication*".ti,ab,kw.                                                                                                                               | 166   |
| 46 | (uplink or downlink).ti,ab,kw.                                                                                                                                     | 316   |
| 47 | exp Telemetry/                                                                                                                                                     | 29542 |

|    |                                                                                                                              |        |
|----|------------------------------------------------------------------------------------------------------------------------------|--------|
| 48 | telemetry.ti,ab,kw.                                                                                                          | 11715  |
| 49 | ("w/kg" or "specific absorption rate").ti,ab,kw.                                                                             | 4962   |
| 50 | or/1-49                                                                                                                      | 217724 |
| 51 | exp male infertility/                                                                                                        | 42437  |
| 52 | (aspermia or asthenozoospermia or azoospermia or oligospermia or "sertoli cell-only syndrome" or teratozoospermia).ti,ab,kw. | 12399  |
| 53 | (sperm adj1 (count or quality or motility or abnormal or mobility or morphology)).ti,ab,kw.                                  | 25827  |
| 54 | ((infertil* or fertil*) adj1 (male* or man or men)).ti,ab,kw.                                                                | 27711  |
| 55 | or/51-54                                                                                                                     | 70391  |
| 56 | 50 and 55                                                                                                                    | 435    |
| 57 | exp female infertility/                                                                                                      | 45057  |
| 58 | ((infertil* or fertil*) adj1 (female* or wom#n)).ti,ab,kw.                                                                   | 17294  |
| 59 | spontaneous abortion/                                                                                                        | 40601  |
| 60 | exp fetus death/                                                                                                             | 38389  |
| 61 | exp induced abortion/                                                                                                        | 29184  |
| 62 | miscarr*.ti,ab,kw.                                                                                                           | 25476  |
| 63 | (abort* adj1 (spontaneous or missed or incomplete or habitual or induce* or therapeutic or eugenic)).ti,ab,kw.               | 24278  |
| 64 | exp intrauterine growth retardation/                                                                                         | 45284  |
| 65 | ((f?etal or intrauterine) adj "growth retardation").ti,ab,kw.                                                                | 9560   |
| 66 | Stillbirth/                                                                                                                  | 17906  |
| 67 | (stillbirth or stillborn or "still birth").ti,ab,kw.                                                                         | 16486  |
| 68 | exp low birth weight/                                                                                                        | 63530  |
| 69 | Sex Ratio/                                                                                                                   | 71846  |
| 70 | "sex ratio*".ti,ab,kw.                                                                                                       | 20418  |
| 71 | exp twinning/                                                                                                                | 147    |
| 72 | exp Multiple Birth Offspring/                                                                                                | 39510  |



|    |                                                                                                                                                                                                                         |         |
|----|-------------------------------------------------------------------------------------------------------------------------------------------------------------------------------------------------------------------------|---------|
| 73 | ("multiple birth*" or twins or triplets or quadruplets or quintuplets or twinning).ti,ab,kw.                                                                                                                            | 46852   |
| 74 | ((congenital or developmental or embryonic) adj1 (disorder* or disease* or condition* or abnormalit* or malformation* or anomal* or defect*)).ti,ab,kw.                                                                 | 103469  |
| 75 | exp congenital disorder/                                                                                                                                                                                                | 1346462 |
| 76 | Maternal Exposure/                                                                                                                                                                                                      | 2684    |
| 77 | prenatal exposure/                                                                                                                                                                                                      | 25180   |
| 78 | "prenatal development*".ti,ab,kw.                                                                                                                                                                                       | 2670    |
| 79 | exp prenatal development/                                                                                                                                                                                               | 225673  |
| 80 | ((embryonic or f?etal) adj (development or death)).ti,ab,kw.                                                                                                                                                            | 58887   |
| 81 | exp pregnancy/ or pregnancy outcome/ or exp pregnancy complication/                                                                                                                                                     | 749798  |
| 82 | pregnant woman/                                                                                                                                                                                                         | 83032   |
| 83 | birth/                                                                                                                                                                                                                  | 18131   |
| 84 | parity/                                                                                                                                                                                                                 | 36641   |
| 85 | newborn/                                                                                                                                                                                                                | 536578  |
| 86 | fetus/                                                                                                                                                                                                                  | 194544  |
| 87 | pregnan*.ti,ab,kw.                                                                                                                                                                                                      | 659092  |
| 88 | (prenatal or "pre natal" or antenatal or "ante natal" or antepartum or "ante partum" or postnatal or "post natal" or postpartum or "post partum" or perinatal or "peri natal" or peripartum or "peri partum").ti,ab,kw. | 437385  |
| 89 | (matern* or mother* or baby or babies or f?etal or f?etus or neonat* or newborn or "new born").ti,ab,kw.                                                                                                                | 1158193 |
| 90 | (birth* or childbirth).ti,ab,kw.                                                                                                                                                                                        | 454801  |
| 91 | (preterm or "pre term").ti,ab,kw.                                                                                                                                                                                       | 110452  |
| 92 | gestation*.ti,ab,kw.                                                                                                                                                                                                    | 295253  |
| 93 | or/57-92                                                                                                                                                                                                                | 3507803 |
| 94 | 50 and 93                                                                                                                                                                                                               | 11652   |
| 95 | 56 or 94                                                                                                                                                                                                                | 12004   |

## Medline search v0.6 translation to EMF database

searches run and exported on 17<sup>th</sup> and 18<sup>th</sup> November 2020. Not possible to build a strategy, so searched line by line and exported immediately. EMF portal added the non-English words. Frequency ranges included: radio frequency, mobile communications and low frequency. All topics and complete time span included.

### Search Strategy:

| #  | Searches                                                                                                                     | EMF terms used                                                                                                                                                                                                                                              | No of results |
|----|------------------------------------------------------------------------------------------------------------------------------|-------------------------------------------------------------------------------------------------------------------------------------------------------------------------------------------------------------------------------------------------------------|---------------|
| 54 | exp Infertility, Male/                                                                                                       |                                                                                                                                                                                                                                                             |               |
| 55 | (aspermia or asthenozoospermia or azoospermia or oligospermia or "sertoli cell-only syndrome" or teratozoospermia).ti,ab,kw. | aspermia, asthenozoospermia, azoospermia, oligospermia, teratozoospermia<br>"sertoli cell-only syndrome"                                                                                                                                                    | 7<br>0        |
| 56 | (sperm adj1 (count or quality or motility or abnormal or mobility or morphology)).ti,ab,kw.                                  | "sperm count", "sperm quality", "sperm motility", Spermienbeweglichkeit, Spermienmotilität, 精子運動能, "abnormal sperm", "sperm mobility", "sperm morphology"                                                                                                   | 166           |
| 57 | ((infertil* or fertil*) adj1 (male* or man or men)).ti,ab,kw.                                                                | infertility, Unfruchtbarkeit, Infertilität, 不妊, fertility, Fortpflanzungsfähigkeit, Fruchtbarkeit, Fertilität, 受胎力 (adjacency operator not available, so not restricted to male only)<br>fertile, infertile, Unfruchtbarkeit, Infertilität, infertility, 不妊 | 408<br>140    |

|    |                                                                                                                |                                                                                                                                                              |     |
|----|----------------------------------------------------------------------------------------------------------------|--------------------------------------------------------------------------------------------------------------------------------------------------------------|-----|
| 58 | or/54-57                                                                                                       |                                                                                                                                                              |     |
| 59 | 51 and 58                                                                                                      |                                                                                                                                                              |     |
| 60 | Infertility, Female/                                                                                           |                                                                                                                                                              |     |
| 61 | ((infertil* or feril*) adj1 (female* or wom#n)).ti,ab,kw.                                                      | See line 57                                                                                                                                                  |     |
| 62 | exp Abortion, Spontaneous/                                                                                     |                                                                                                                                                              |     |
| 63 | Aborted Fetus/                                                                                                 |                                                                                                                                                              |     |
| 64 | exp Abortion, Induced/                                                                                         |                                                                                                                                                              |     |
| 65 | (miscarriage or miscarry).ti,ab,kw.                                                                            | miscarriage, Fehlgeburt, Abort, abortion, 流産, Fehlgeburt, Abort, miscarriage, abortion, 流産, miscarry, miscarried                                             | 141 |
| 66 | (abort* adj1 (spontaneous or missed or incomplete or habitual or induce* or therapeutic or eugenic)).ti,ab,kw. | Abort, Fehlgeburt, miscarriage, abortion, 流産, abortions, abortion, Fehlgeburt, Abort, miscarriage, 流産, Fehlgeburt, Abort, miscarriage, abortion, 流産, aborted | 141 |
| 67 | Fetal Growth Retardation/                                                                                      |                                                                                                                                                              |     |
| 68 | ((f?etal or intrauterine) adj "growth retardation").ti,ab,kw.                                                  | "fetal growth retardation", "foetal growth retardation", "intrauterine growth retardation"                                                                   | 12  |
| 69 | Stillbirth/                                                                                                    |                                                                                                                                                              |     |

|    |                                                                                                                                                                              |                                                                       |            |
|----|------------------------------------------------------------------------------------------------------------------------------------------------------------------------------|-----------------------------------------------------------------------|------------|
| 70 | (stillbirth or stillborn).ti,ab,kw.                                                                                                                                          | "still born", stillborn, "still birth", stillbirth, Totgeburt, 死産     | 405        |
| 71 | exp Infant, Low Birth Weight/                                                                                                                                                |                                                                       |            |
| 72 | ("low birth weight" or "small for gestational age").ti,ab,kw.                                                                                                                | "low birth weight", "small for gestational age"                       | 32         |
| 73 | Sex Ratio/                                                                                                                                                                   |                                                                       |            |
| 74 | "sex ratio*".ti,ab,kw.                                                                                                                                                       | "sex ratio", Geschlechtsverhältnis, 性比                                | 56         |
| 75 | exp twinning, embryonic/                                                                                                                                                     |                                                                       |            |
| 76 | exp Multiple Birth Offspring/                                                                                                                                                |                                                                       |            |
| 77 | "multiple birth*".ti,ab,kw.                                                                                                                                                  | twins, triplets, quadruplets, quintuplets, twinning, "multiple birth" | 75         |
| 78 | ((congenital or developmental or fetal or prenatal or embryonic) adj1 (disorder* or disease* or condition* or abnormalit* or malformation* or anomal* or defect*)).ti,ab,kw. | Congenital<br>developmental<br>Other terms are included below         | 104<br>235 |
| 79 | exp Congenital Abnormalities/                                                                                                                                                |                                                                       |            |
| 80 | Maternal Exposure/                                                                                                                                                           |                                                                       |            |
| 81 | ((prenatal or maternal) adj exposure*).ti,ab,kw.                                                                                                                             | Prenatal and maternal included below                                  |            |
| 82 | Prenatal Exposure Delayed Effects/                                                                                                                                           |                                                                       |            |
| 83 | "prenatal development*".ti,ab,kw.                                                                                                                                            | Prenatal included below                                               |            |

|    |                                                                                                                                                                                                                         |                                                                                                                                                               |     |
|----|-------------------------------------------------------------------------------------------------------------------------------------------------------------------------------------------------------------------------|---------------------------------------------------------------------------------------------------------------------------------------------------------------|-----|
| 84 | exp "Embryonic and Fetal Development"/                                                                                                                                                                                  |                                                                                                                                                               |     |
| 85 | ((embryonic or fetal) adj (development or death)).ti,ab,kw.                                                                                                                                                             | Embryo, embryonic<br>Fetal etc covered below                                                                                                                  | 769 |
| 86 | or/60-85                                                                                                                                                                                                                |                                                                                                                                                               |     |
| 87 | 51 and 86                                                                                                                                                                                                               |                                                                                                                                                               |     |
| 88 | exp Pregnancy Trimesters/ or exp Pregnancy/ or exp Pregnancy Outcome/ or exp Pregnancy Complications/                                                                                                                   |                                                                                                                                                               |     |
| 89 | exp Pregnant Women/                                                                                                                                                                                                     |                                                                                                                                                               |     |
| 90 | exp Parturition/                                                                                                                                                                                                        |                                                                                                                                                               |     |
| 91 | exp Gravity/                                                                                                                                                                                                            |                                                                                                                                                               |     |
| 92 | exp Parity/                                                                                                                                                                                                             |                                                                                                                                                               |     |
| 93 | exp Infant, Newborn/                                                                                                                                                                                                    |                                                                                                                                                               |     |
| 94 | exp Fetus/                                                                                                                                                                                                              |                                                                                                                                                               |     |
| 95 | pregnan*.ti,ab,kw.                                                                                                                                                                                                      | Pregnant, pregnancies, Schwangerschaft, pregnancy, pregnancy, Schwangerschaft, Schwangerschaft, pregnancy                                                     | 837 |
| 96 | (prenatal or "pre natal" or antenatal or "ante natal" or antepartum or "ante partum" or postnatal or "post natal" or postpartum or "post partum" or perinatal or "peri natal" or peripartum or "peri partum").ti,ab,kw. | prenatal "pre natal" antenatal "ante natal" antepartum "ante partum prenatal, pränatal, 出生前の, "pre natal", antenatal, "ante natal", antepartum, "ante partum" | 538 |

|     |                                                                                                          |                                                                                                                                                                                                                                                                                                                                                                                                                       |                                 |
|-----|----------------------------------------------------------------------------------------------------------|-----------------------------------------------------------------------------------------------------------------------------------------------------------------------------------------------------------------------------------------------------------------------------------------------------------------------------------------------------------------------------------------------------------------------|---------------------------------|
|     |                                                                                                          | postnatal "post natal" postpartum "post partum" perinatal "peri natal" peripartum "peri partum"                                                                                                                                                                                                                                                                                                                       | 244                             |
| 97  | (matern* or mother* or baby or babies or f?etal or f?etus or neonat* or newborn or "new born").ti,ab,kw. | baby, babies, mother, mothers<br>maternal, mütterlich, 母親の, maternity<br>fetal, fetus, foetal, foetus, Fetus, Fötus, 胎児,<br>Fetus, Fötus, 胎児, Fetus, Fötus, 胎児, Fetus,<br>Fötus, 胎児<br>neonate, neonates, neonatal, neugeboren,<br>newborn, 新生児の, 新生児<br>newborn, newborns "new born" neugeboren,<br>neonatal, 新生児の, 新生児, neugeboren,<br>neonatal, newborn, 新生児の, 新生児,<br>neugeboren, neonatal, newborn, 新生児の,<br>新生児 | 240<br>262<br>751<br>468<br>463 |
| 98  | (birth* or childbirth).ti,ab,kw.                                                                         | Birth, births, birthed, birthing, childbirth, childbirths,                                                                                                                                                                                                                                                                                                                                                            | 362                             |
| 99  | (preterm or "pre term").ti,ab,kw.                                                                        | Preterm, "pre term"                                                                                                                                                                                                                                                                                                                                                                                                   | 33                              |
| 100 | gestation*.ti,ab,kw.                                                                                     | Gestation, gestations, gestational, Tragzeit, 妊娠                                                                                                                                                                                                                                                                                                                                                                      | 525                             |
| 101 | or/88-100                                                                                                |                                                                                                                                                                                                                                                                                                                                                                                                                       |                                 |
| 102 | 51 and 101                                                                                               |                                                                                                                                                                                                                                                                                                                                                                                                                       |                                 |
| 103 | 59 or 87                                                                                                 |                                                                                                                                                                                                                                                                                                                                                                                                                       |                                 |

|                                                                         |            |  |             |
|-------------------------------------------------------------------------|------------|--|-------------|
| 104                                                                     | 102 or 103 |  |             |
| <b>Total number of records retrieved:</b>                               |            |  | <b>7414</b> |
| <b>Deduplicated total: (matched author, year, title, journal title)</b> |            |  | <b>2398</b> |
